# Supplementary material for: Carbazole modified salicylaldimines and their difluoroboron complexes: effect of the tert-butyl and trifluoromethyl terminal groups on organogelation and piezofluorochromism
Source: Royal Society of Chemistry journal article supplement (doi:10.1039/c6nj03063g), 2016-12-17
Supplement: c6nj03063g1.pdf [file c6nj03063g1.pdf]

**Supporting Information For:**

**Carbazole modified salicylaldimines and the difluoroboron complexes: effect of  
the terminal groups of *tert*-butyl and trifluoromethyl on the organogelation and  
piezofluorochromism**

**Table S1.** Photophysical data of compounds **1a-3a** and their complexes **1b-3b**.

| Compound  | Solvents        | $\lambda_{\text{abs}}^{\text{max}}/\text{nm}$ | $\lambda_{\text{em}}/\text{nm}$ | Stokes shift <sup>a</sup> /nm | $\Phi_{\text{F}}^{\text{b}}$ |
|-----------|-----------------|-----------------------------------------------|---------------------------------|-------------------------------|------------------------------|
| <b>1a</b> | Cyclohexane     | 371                                           | 550                             | 179                           | < 0.01                       |
|           | Toluene         | 370                                           | 551                             | 181                           | < 0.01                       |
|           | Ethyl acetate   | 363                                           | 550                             | 187                           | < 0.01                       |
|           | Chloroform      | 369                                           | 548                             | 179                           | < 0.01                       |
|           | Dichloromethane | 366                                           | 550                             | 184                           | < 0.01                       |
| <b>2a</b> | Cyclohexane     | 375                                           | 569                             | 194                           | < 0.01                       |
|           | Toluene         | 376                                           | 569                             | 193                           | < 0.01                       |
|           | Ethyl acetate   | 368                                           | 580                             | 212                           | < 0.01                       |
|           | Chloroform      | 375                                           | 579                             | 204                           | < 0.01                       |
|           | Dichloromethane | 375                                           | 583                             | 208                           | < 0.01                       |
| <b>3a</b> | Cyclohexane     | 383                                           | 550                             | 167                           | < 0.01                       |
|           | Toluene         | 381                                           | 552                             | 171                           | < 0.01                       |
|           | Ethyl acetate   | 370                                           | 549                             | 179                           | < 0.01                       |
|           | Chloroform      | 378                                           | 551                             | 173                           | < 0.01                       |
|           | Dichloromethane | 375                                           | 550                             | 175                           | < 0.01                       |
| <b>1b</b> | Cyclohexane     | 400                                           | 494, 517                        | 94                            | 0.15                         |
|           | Toluene         | 399                                           | 535                             | 136                           | 0.19                         |
|           | Ethyl acetate   | 387                                           | 586                             | 199                           | 0.02                         |
|           | Chloroform      | 405                                           | 577                             | 172                           | 0.09                         |
|           | Dichloromethane | 401                                           | 605                             | 204                           | 0.01                         |

|           |                 |     |          |     |        |
|-----------|-----------------|-----|----------|-----|--------|
| <b>2b</b> | Cyclohexane     | 395 | 502, 526 | 107 | 0.11   |
|           | Toluene         | 412 | 532      | 120 | 0.25   |
|           | Ethyl acetate   | 397 | 588      | 191 | 0.01   |
|           | Chloroform      | 416 | 599      | 183 | 0.03   |
|           | Dichloromethane | 412 | 615      | 203 | < 0.01 |
| <b>3b</b> | Cyclohexane     | 428 | 514, 543 | 86  | 0.22   |
|           | Toluene         | 415 | 563      | 148 | 0.16   |
|           | Ethyl acetate   | 395 | 607      | 212 | <0.01  |
|           | Chloroform      | 418 | 621      | 203 | < 0.01 |

<sup>a</sup> Calculated from the difference of  $\lambda_{em}$  and  $\lambda_{abs}^{max}$ .

<sup>b</sup> Fluorescence quantum yields were determined by a standard method with diphenylanthracene in benzene ( $\Phi_F = 0.85$ ,  $\lambda_{ex} = 390$  nm) as reference.

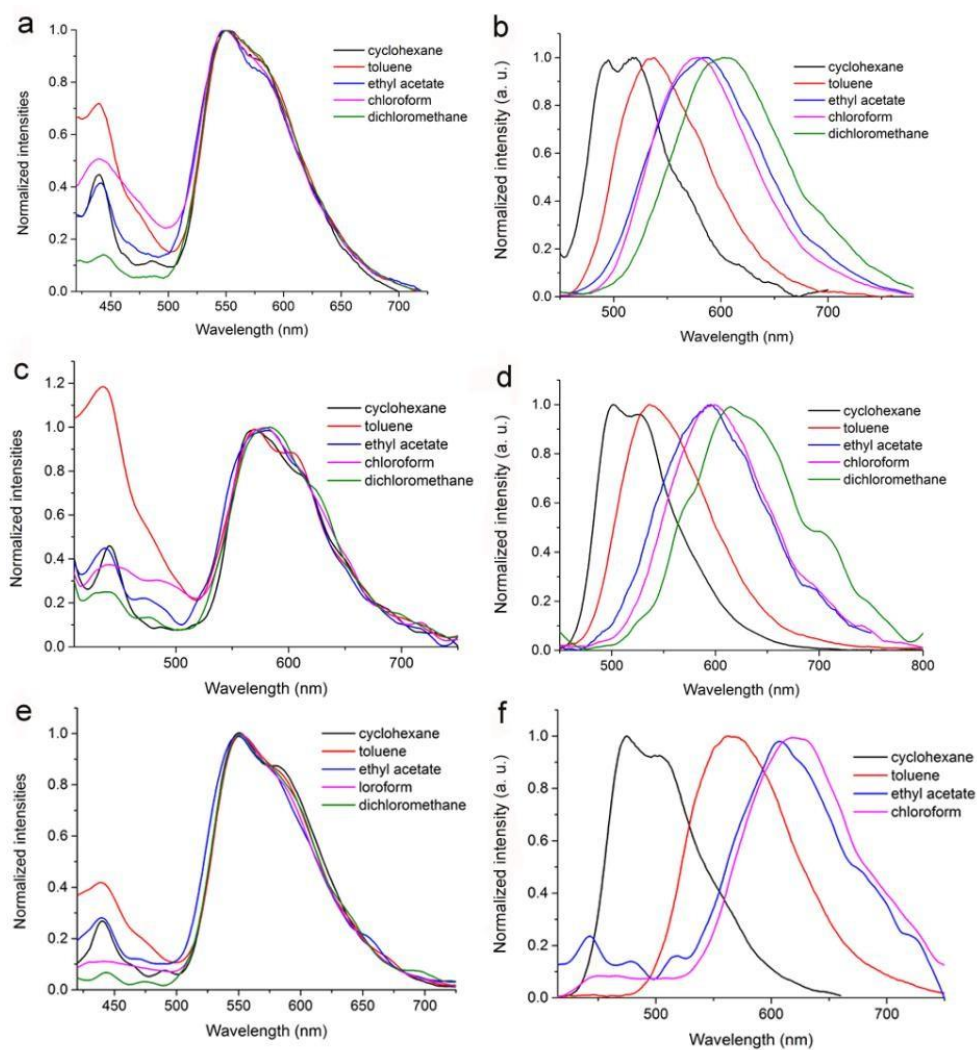

**Fig. S1** Normalized fluorescence emission spectra of **1a** (a), **1b** (b), **2a** (c), **2b** (d), **3a** (e) and **3b** (f) in different solvents ( $1.0 \times 10^{-5}M$ ,  $\lambda_{ex} = 390$  nm).

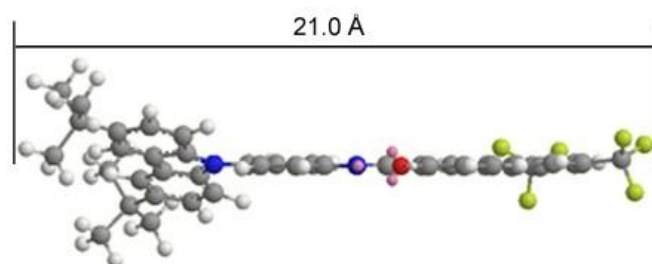

**Fig. S2** The optimized configurations for **3a** calculated by the **DFT** method (B3LYP/6-31G level) on Gaussian 09 software.

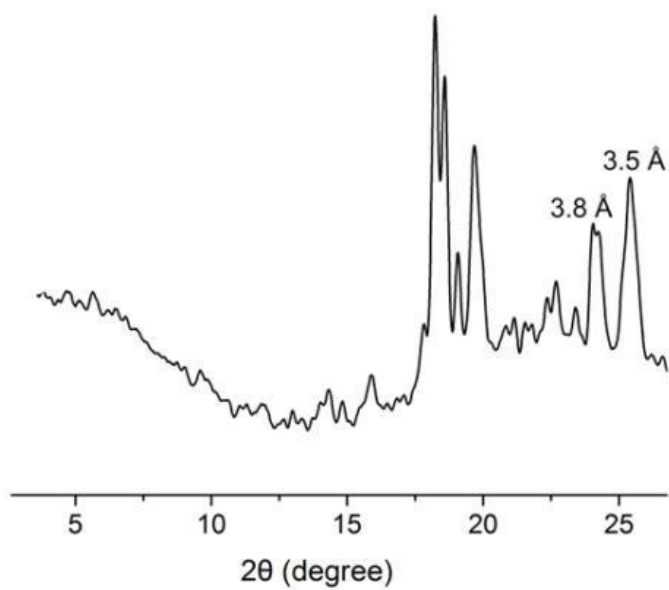

**Fig. S3** XRD pattern of xerogel **3b** obtained from cyclohexane.

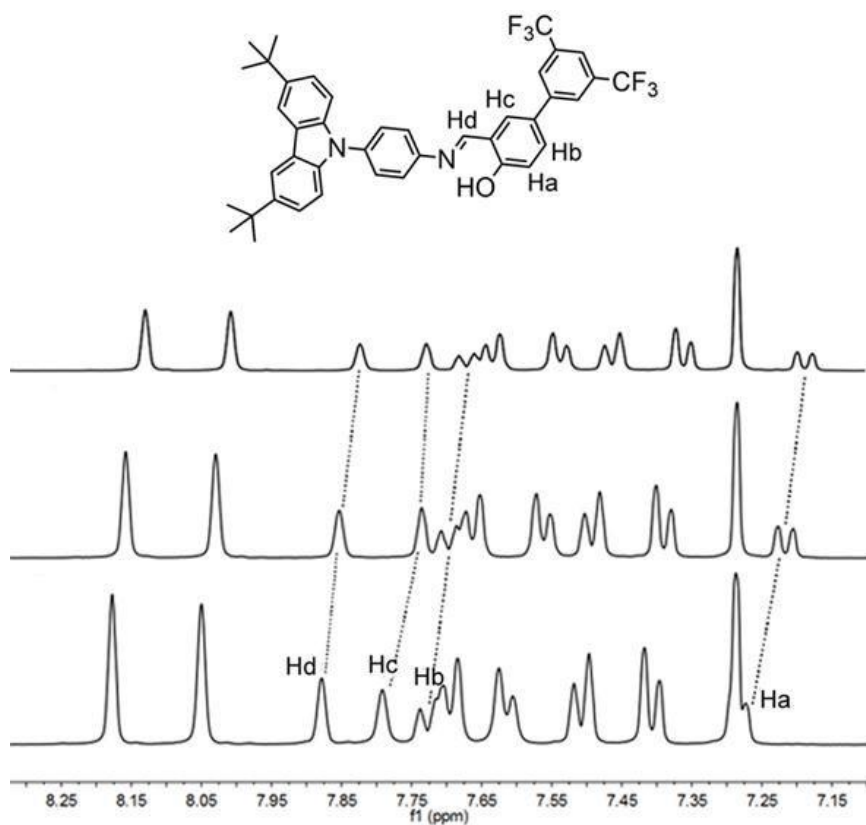

**Fig. S4** <sup>1</sup>H NMR spectra of **3a** in the absence (a) as well as in the presence of 1.0 equiv. (b) and 2.0 equiv. (c) of TBAF.

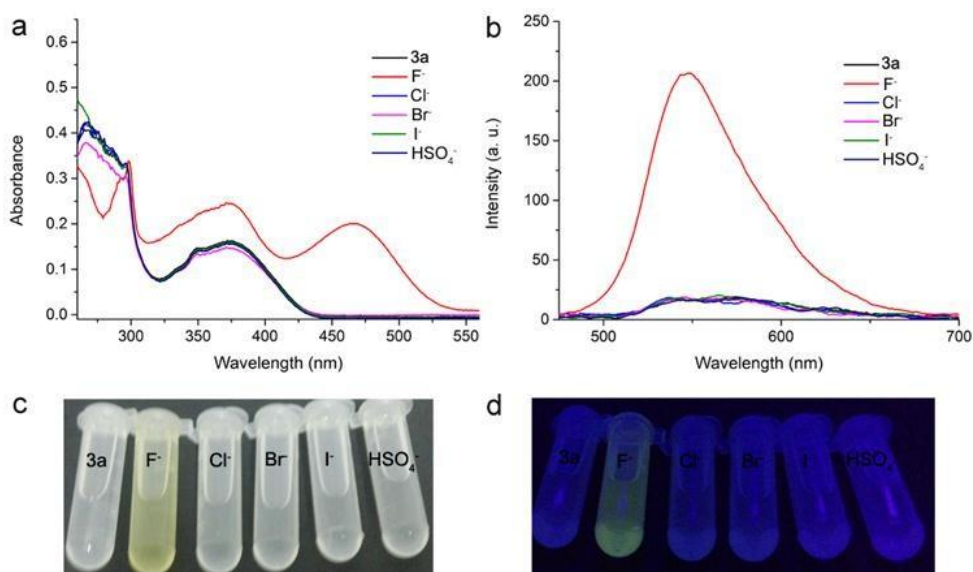

**Fig. S5** UV-vis absorption (a) and fluorescence emission (b,  $\lambda_{\text{ex}} = 380$  nm) spectra of **3a** ( $1.0 \times 10^{-5}$  M) in the presence of various tetrabutylammonium anions (4 equiv.) in THF; Photos of **3a** in THF in the presence of 4 equiv. anions under daylight (c) and UV irradiation at 365 nm (d).

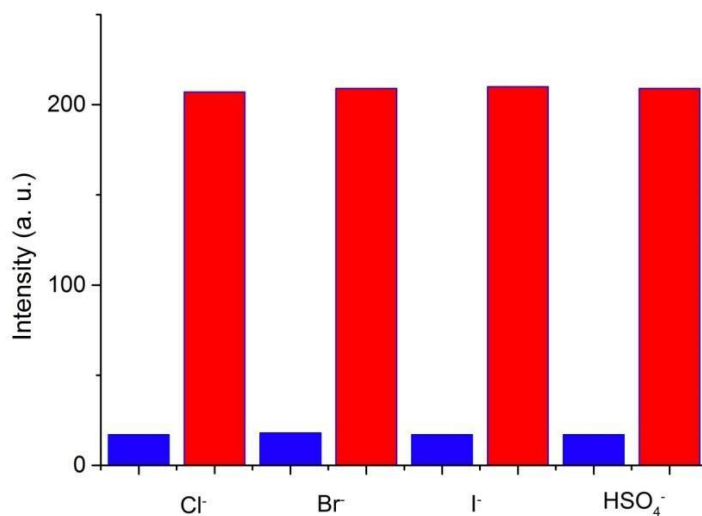

**Fig. S6** Fluorescence intensity at 567 nm for **3a** ( $1.0 \times 10^{-5}$  M) in THF upon the addition of 4 equiv. of Cl<sup>-</sup>, Br<sup>-</sup>, I<sup>-</sup> and HSO<sub>4</sub><sup>-</sup> (blue bar, from left to right) and fluorescence intensity at 567 nm for **3a** ( $1.0 \times 10^{-5}$  M) in THF upon the addition of 4 equiv. of F<sup>-</sup> in presence of 4 equiv. of Cl<sup>-</sup>, Br<sup>-</sup>, I<sup>-</sup> and HSO<sub>4</sub><sup>-</sup> (red bar, from left to right).

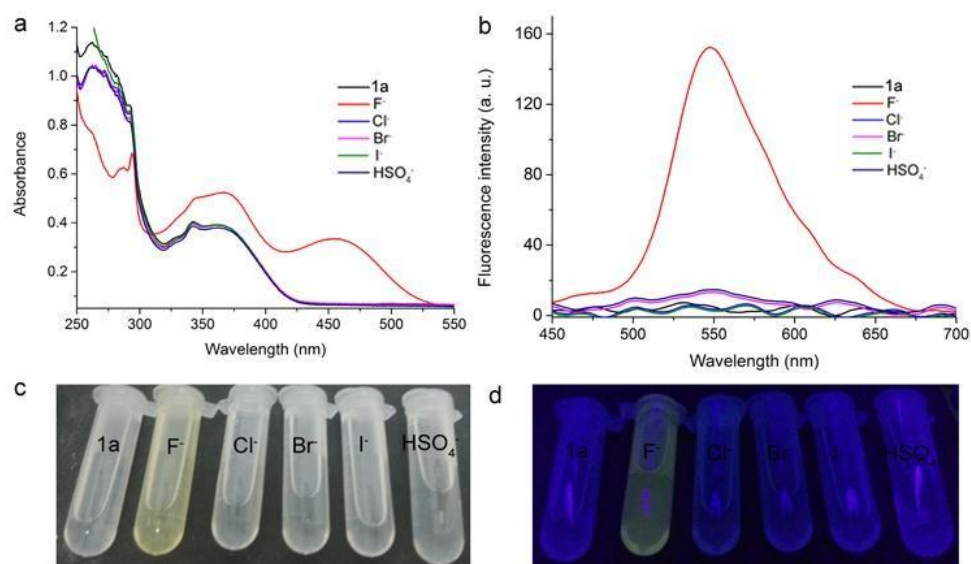

**Fig. S7** UV-vis absorption (a) and fluorescence emission (b,  $\lambda_{\text{ex}} = 390$  nm) spectra of **1a** ( $1.0 \times 10^{-5}$  M) in the presence of various tetrabutylammonium anions (4 equiv.) in THF; Photos of **1a** in THF in the presence of 4 equiv. anions under daylight (c) and UV irradiation at 365 nm (d).

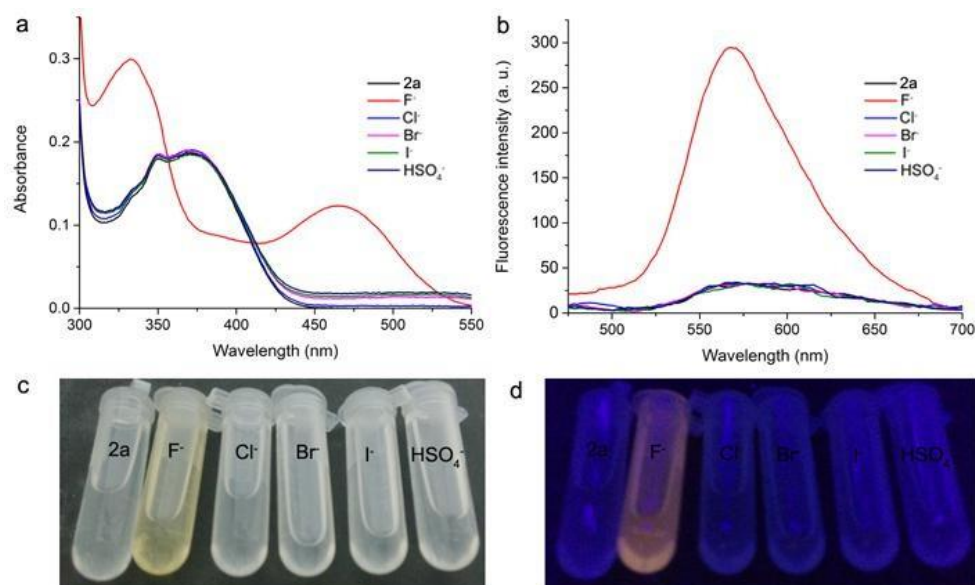

**Fig. S8** UV-vis absorption (a) and fluorescence emission (b,  $\lambda_{\text{ex}} = 410$  nm) spectra of **2a** ( $1.0 \times 10^{-5}$  M) in the presence of various tetrabutylammonium anions (4 equiv.) in THF; Photos of **2a** in THF in the presence of 4 equiv. anions under daylight (c) and UV irradiation at 365 nm (d).

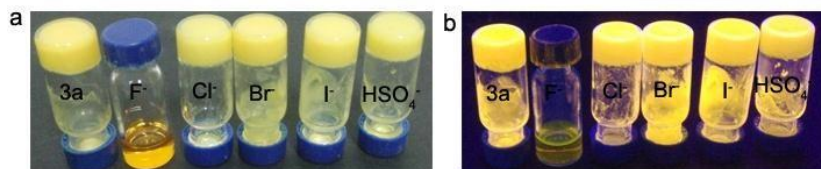

**Fig. S9** Photos of organogel **3a** in *n*-heptane in the presence of 4 equiv. anions under daylight (a) and UV irradiation at 365 nm (b).

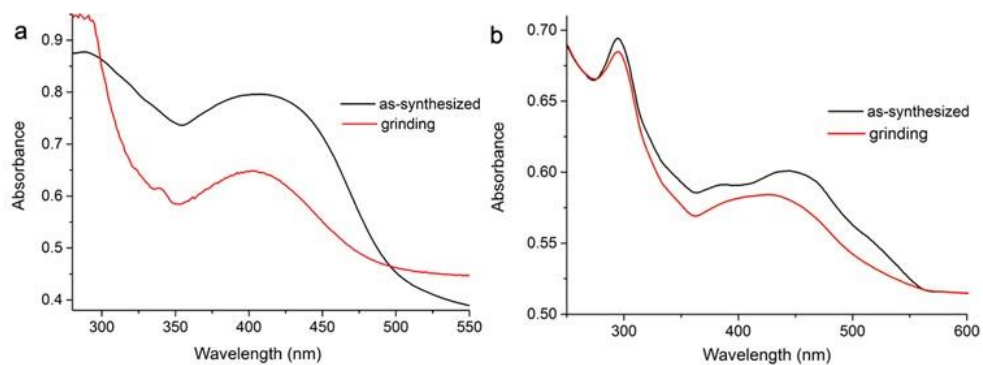

**Fig. S10** UV-vis spectra of **1b** (a) and **3b** (b) in as-prepared crystal and ground powders.



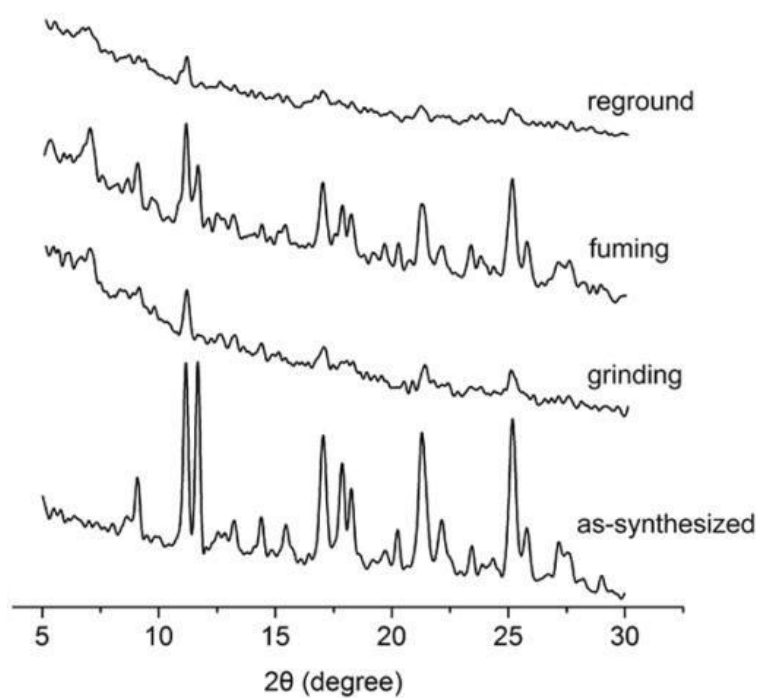

**Fig. S11** XRD patterns of compound **1b** in different solid states.

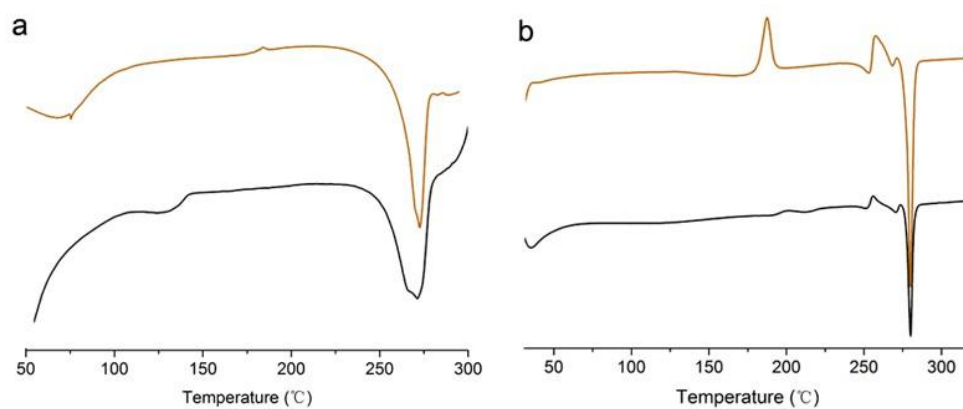

**Figure S12.** DSC thermograms of **1b** (a) and **3b** (b) in as-prepared crystal (black line) and ground powder (red line) under nitrogen atmosphere at a heating rate of 10 °C/min.

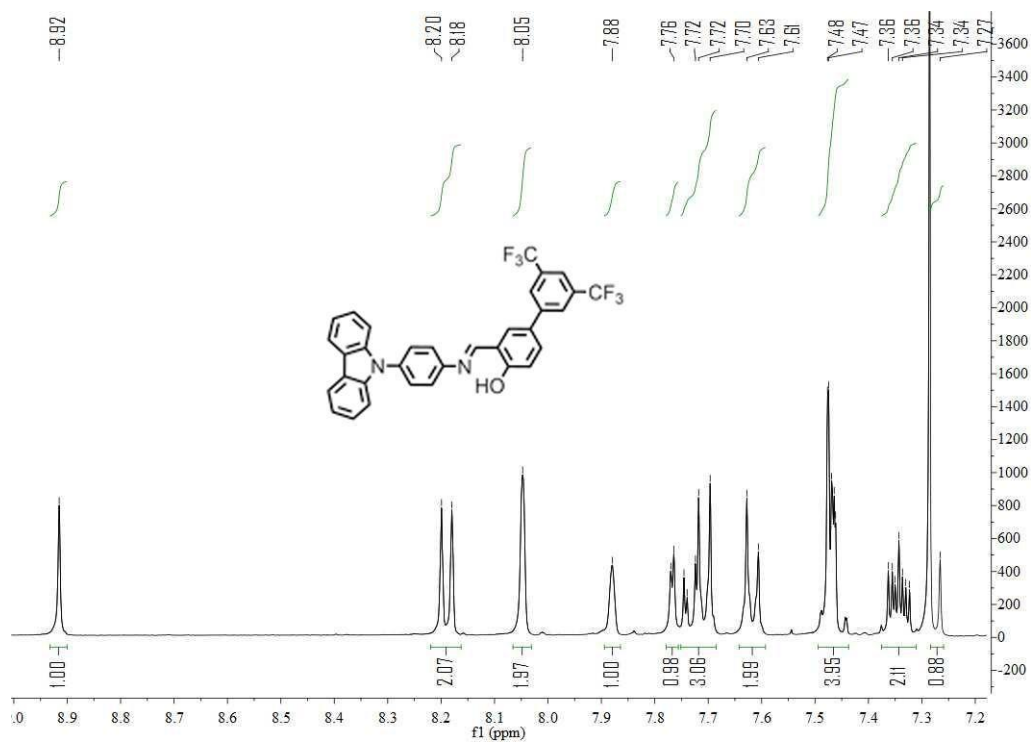

**Fig. S13** <sup>1</sup>H NMR (400 MHz, CDCl<sub>3</sub>) spectrum of **1a**.

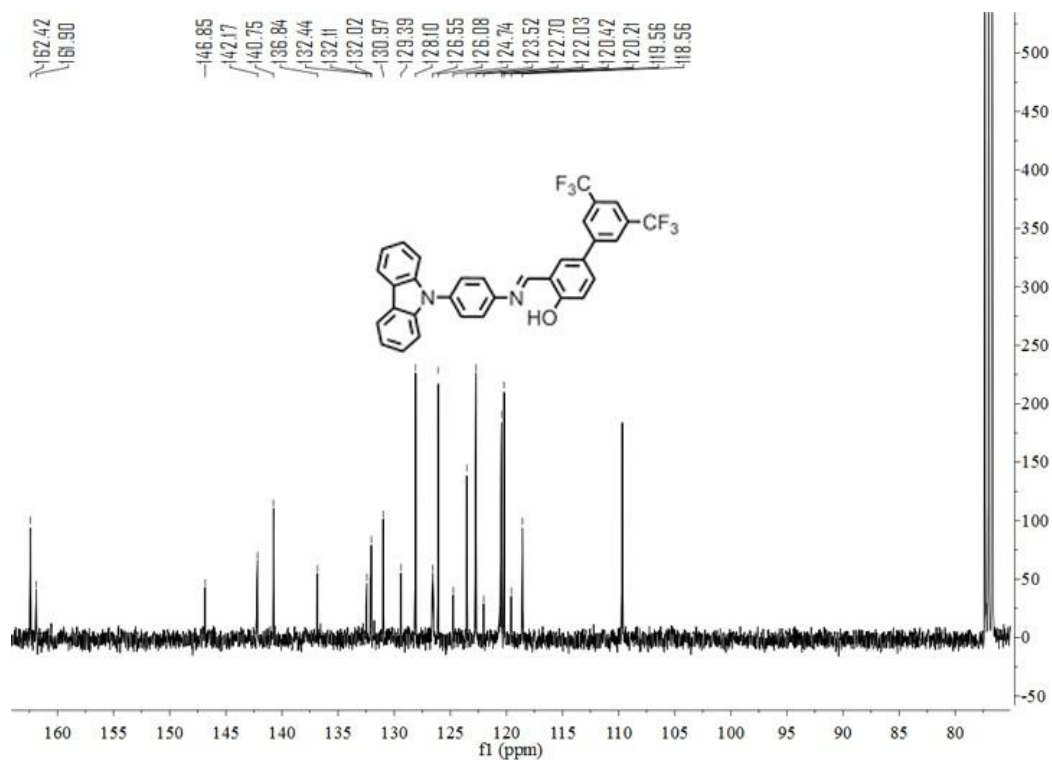

**Fig. S14** <sup>13</sup>C NMR (100 MHz, CDCl<sub>3</sub>) spectrum of **1a**.

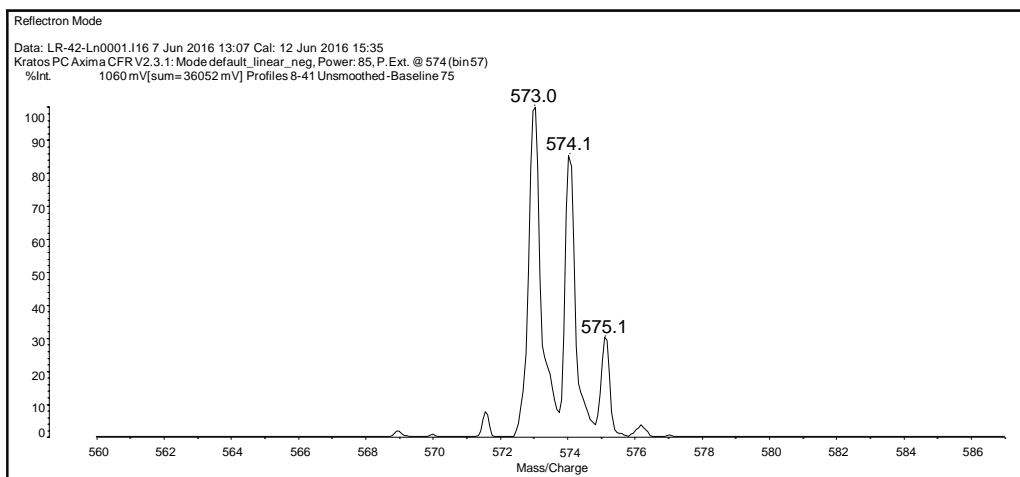

**Fig. S15** MALDI/TOF MS spectrum of **1a**.

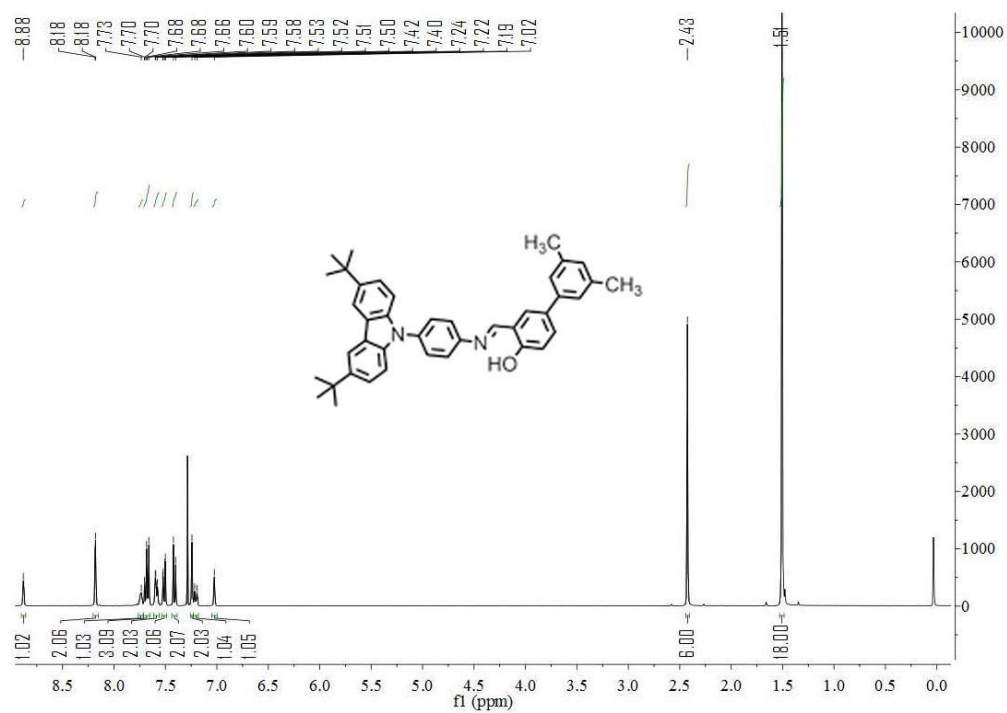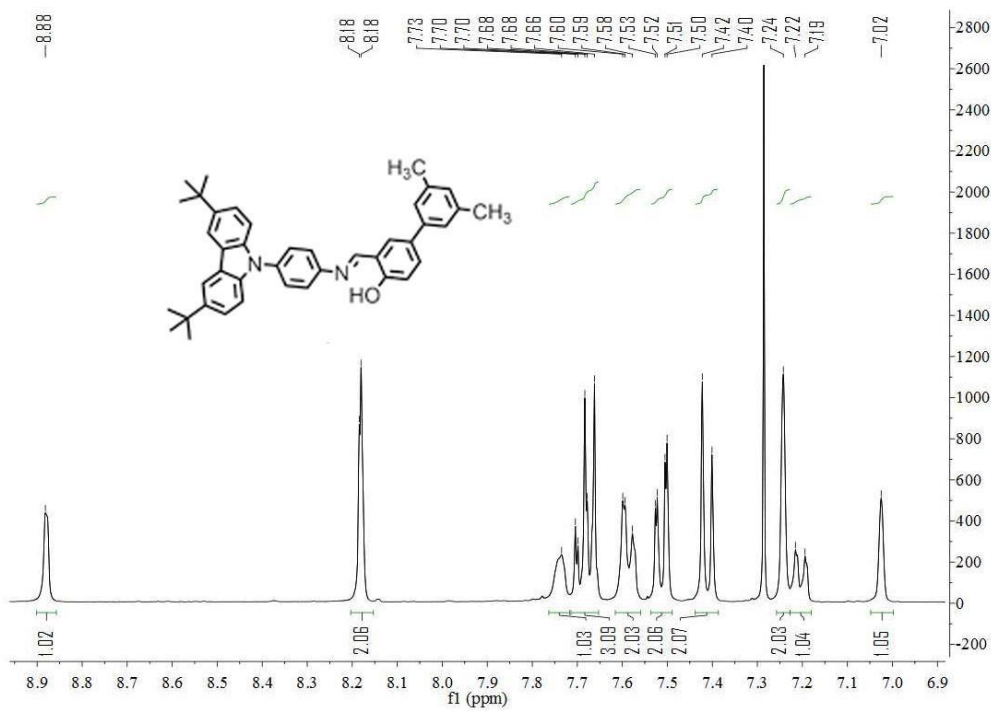

Fig. S16  $^1\text{H}$  NMR (400 MHz,  $\text{CDCl}_3$ ) spectrum of 2a.

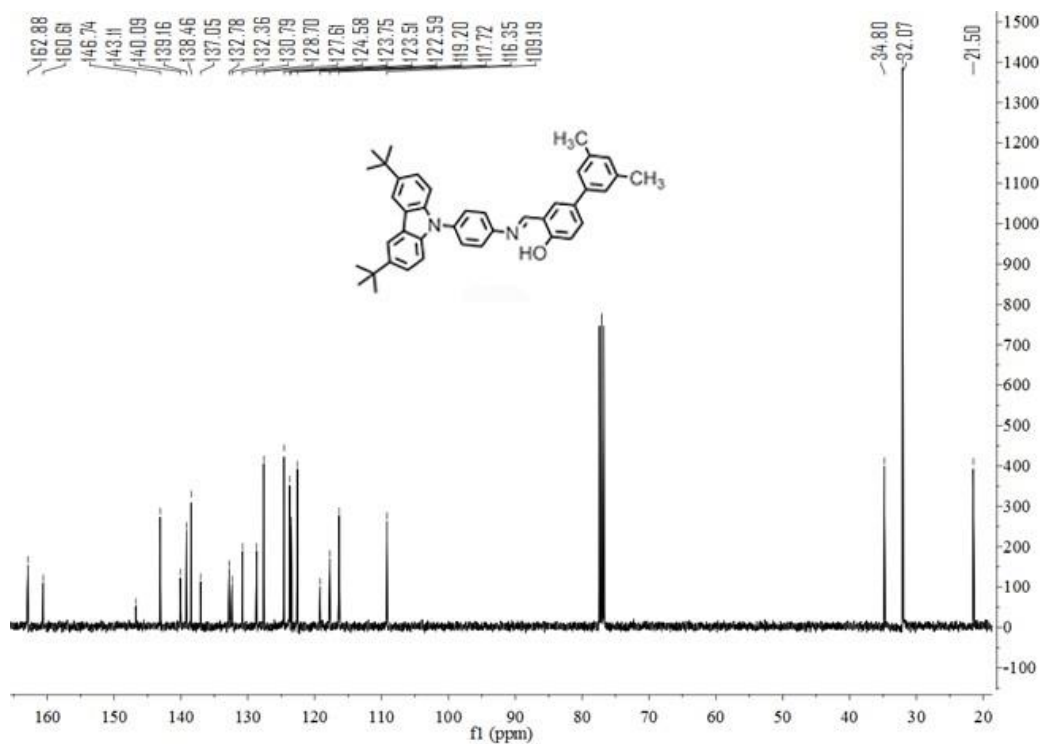

**Fig. S17**  $^{13}\text{C}$  NMR (100 MHz,  $\text{CDCl}_3$ ) spectrum of **2a**.

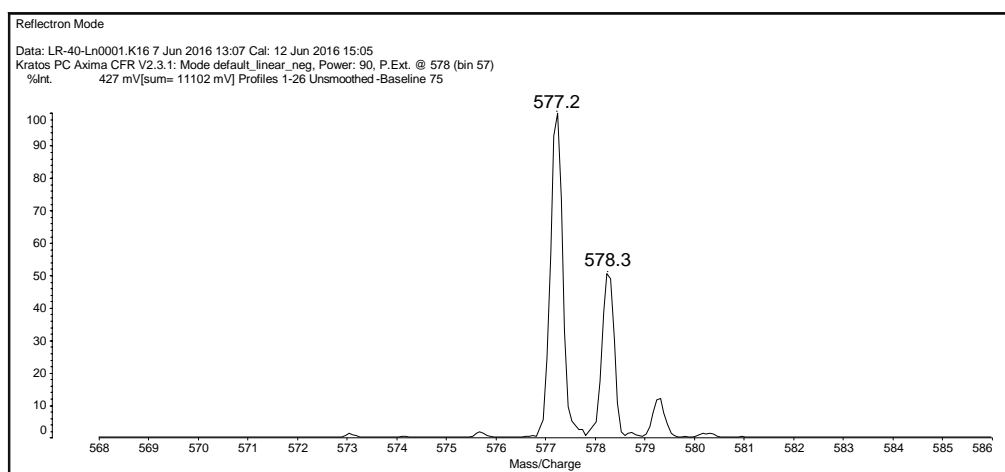

**Fig. S18** MALDI/TOF MS spectrum of **2a**.

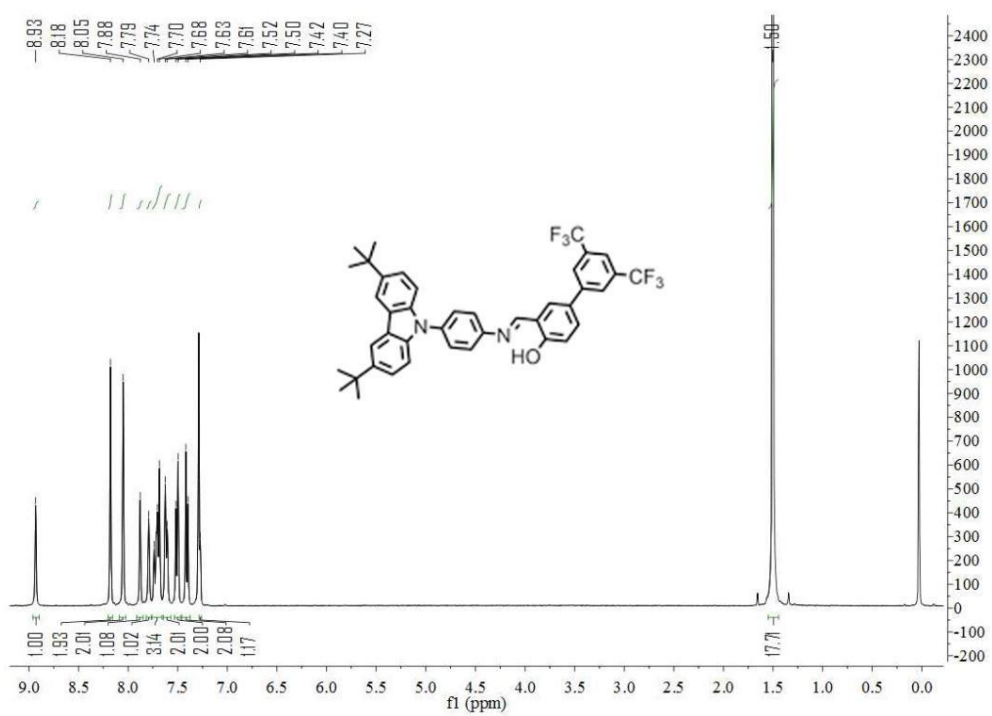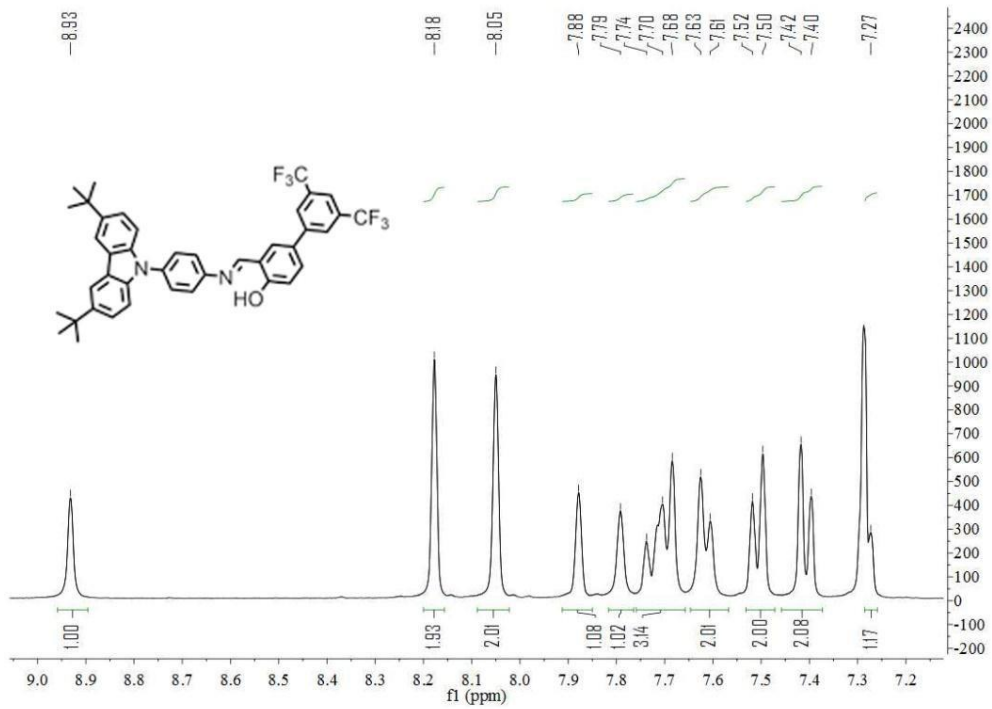

**Fig. S19**  $^1\text{H}$  NMR (400 MHz,  $\text{CDCl}_3$ ) spectrum of **3a**.

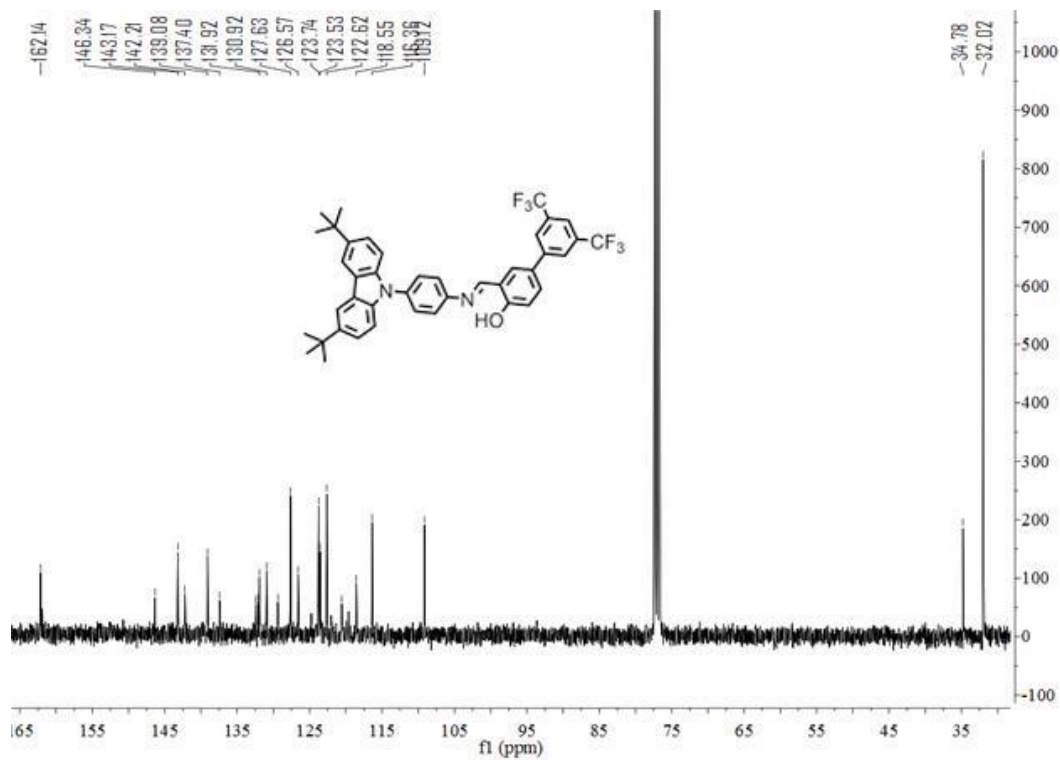

**Fig. S20** <sup>13</sup>C NMR (100 MHz, CDCl<sub>3</sub>) spectrum of **3a**.

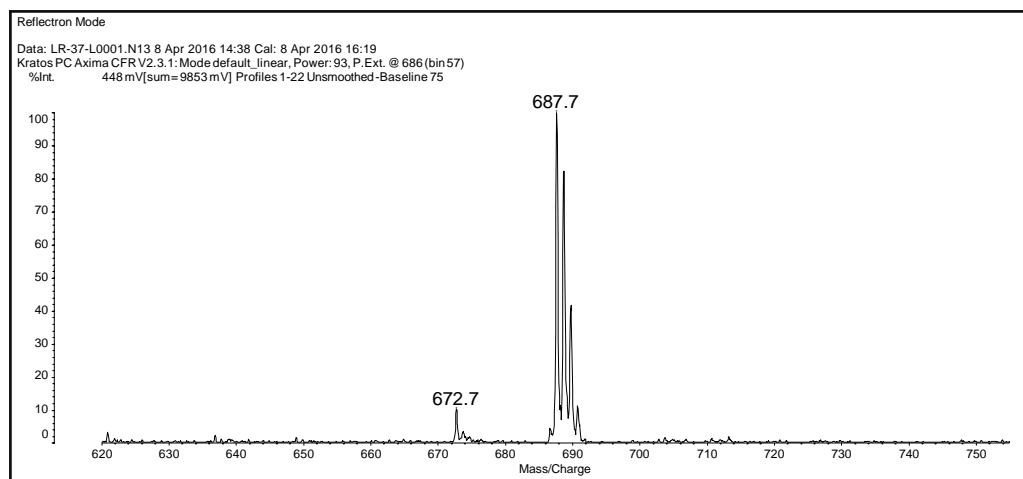

**Fig. S21** MALDI/TOF MS spectrum of **3a**.

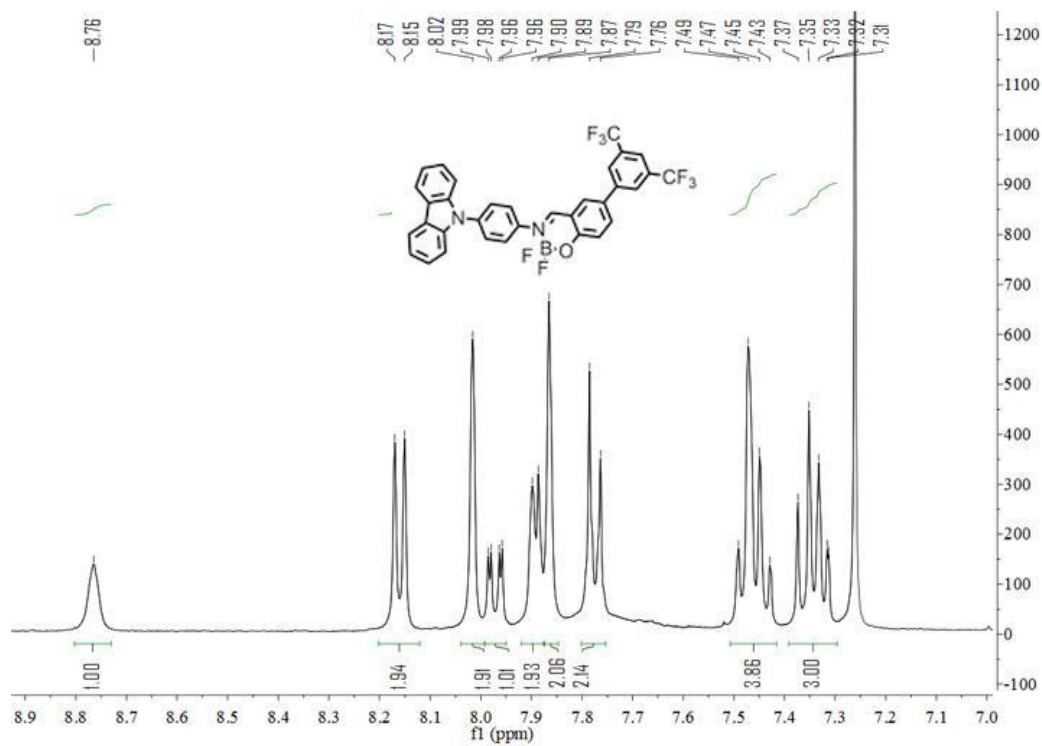

**Fig. S22**  $^1\text{H}$  NMR (400 MHz,  $\text{CDCl}_3$ ) spectrum of **1b**.

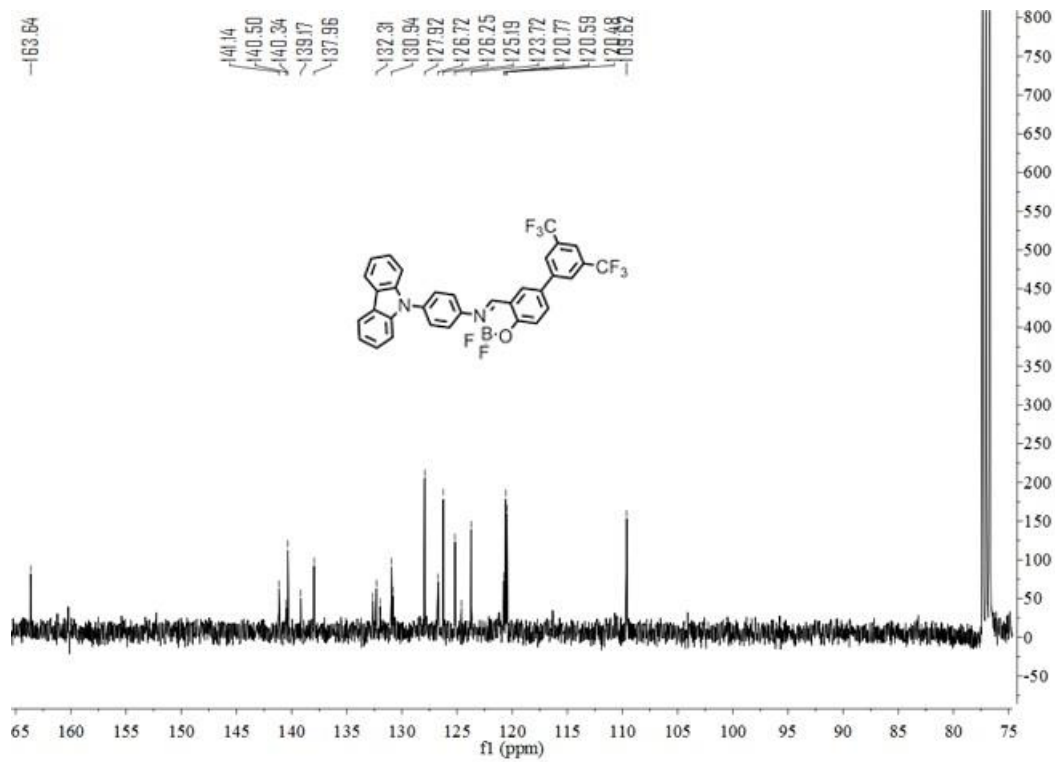

**Fig. S23**  $^{13}\text{C}$  NMR (100 MHz,  $\text{CDCl}_3$ ) spectrum of **1b**.



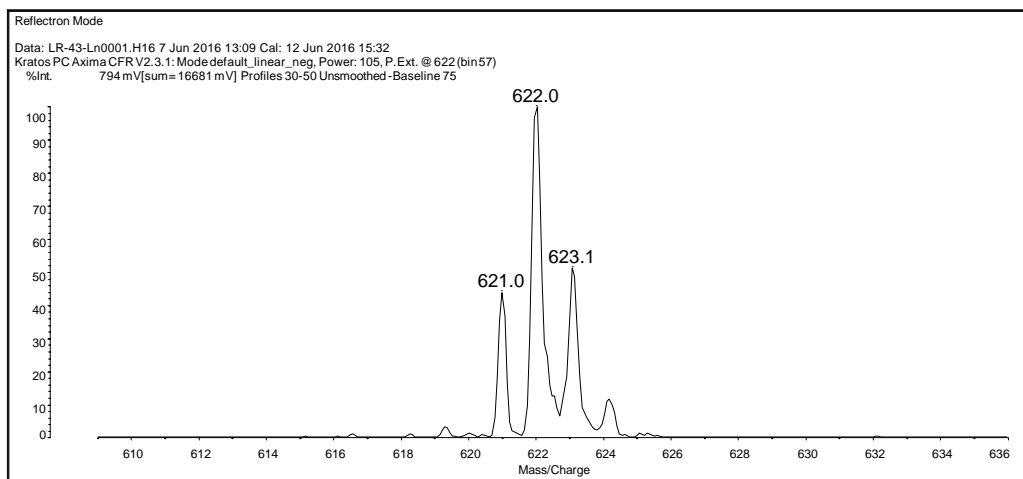

**Fig. S24** MALDI/TOF MS spectrum of **1b**.

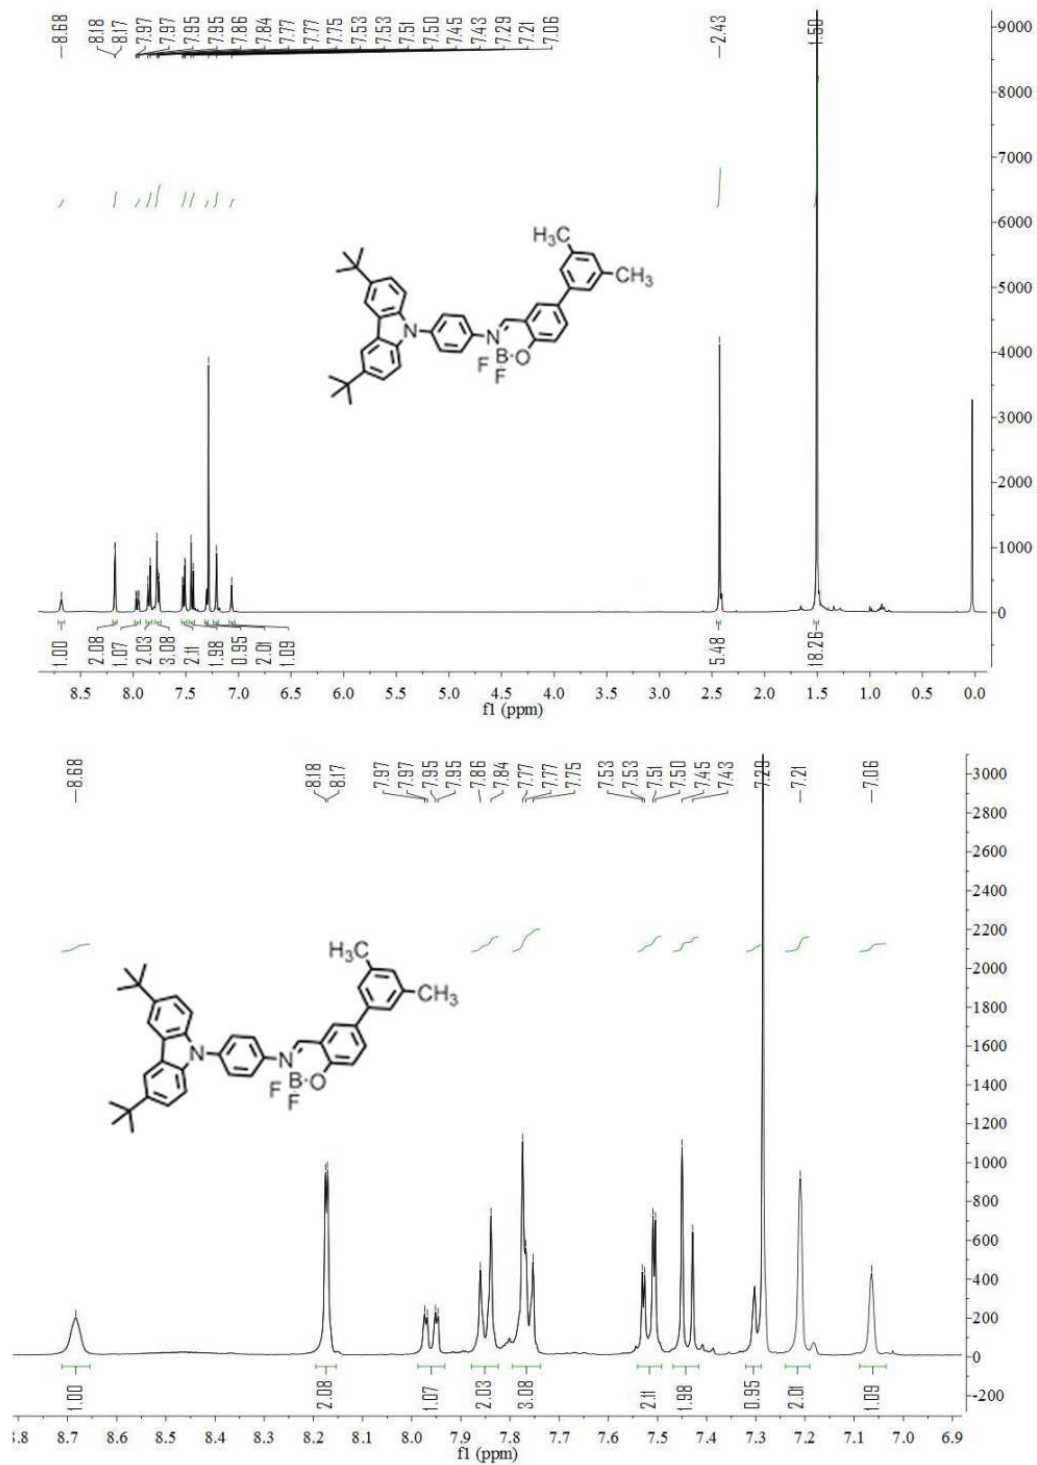

**Fig. S25**  $^1\text{H}$  NMR (400 MHz,  $\text{CDCl}_3$ ) spectrum of **2b**.

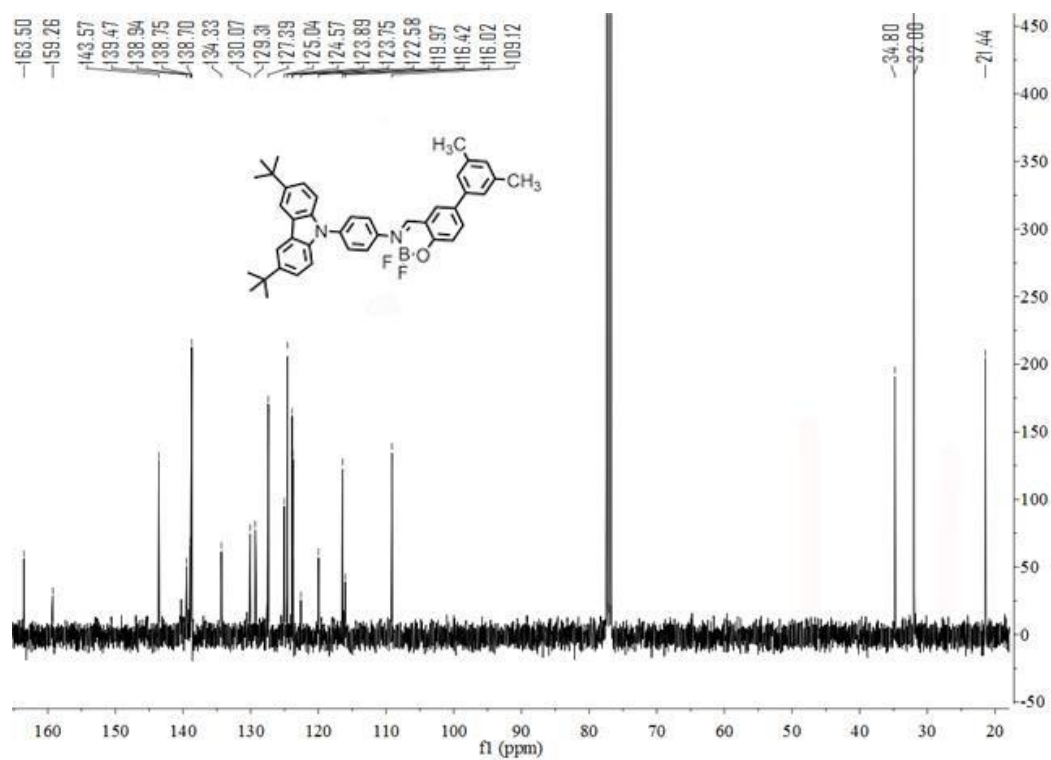

**Fig. S26** <sup>13</sup>C NMR (100 MHz, CDCl<sub>3</sub>) spectrum of **2b**.

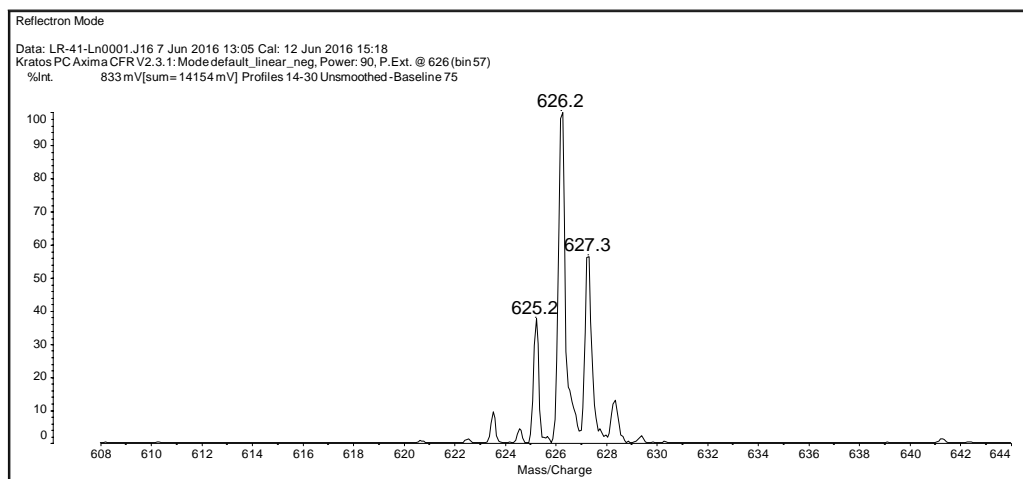

**Fig. S27** MALDI/TOF MS spectrum of **2b**.

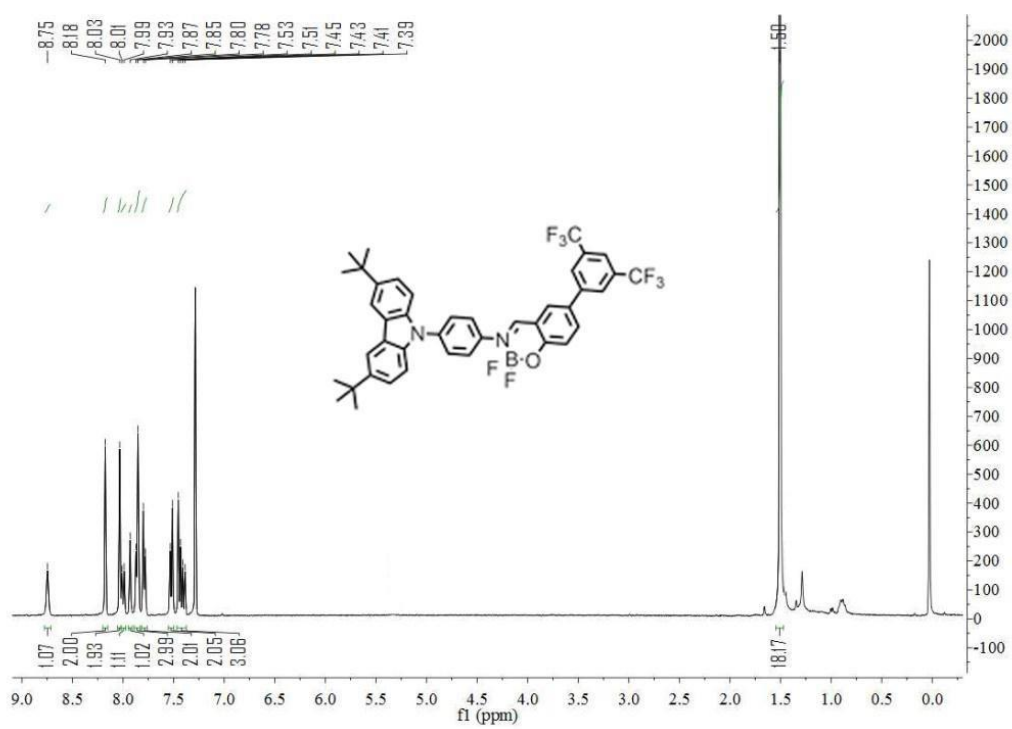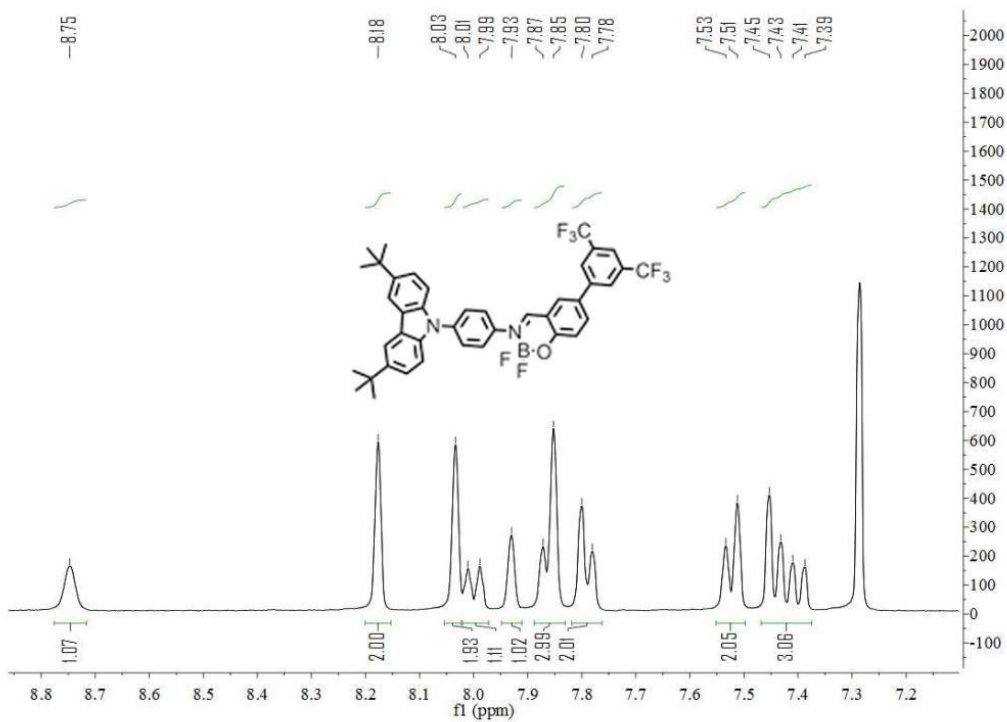

**Fig. S28**  $^1\text{H}$  NMR (400 MHz,  $\text{CDCl}_3$ ) spectrum of **3b**.

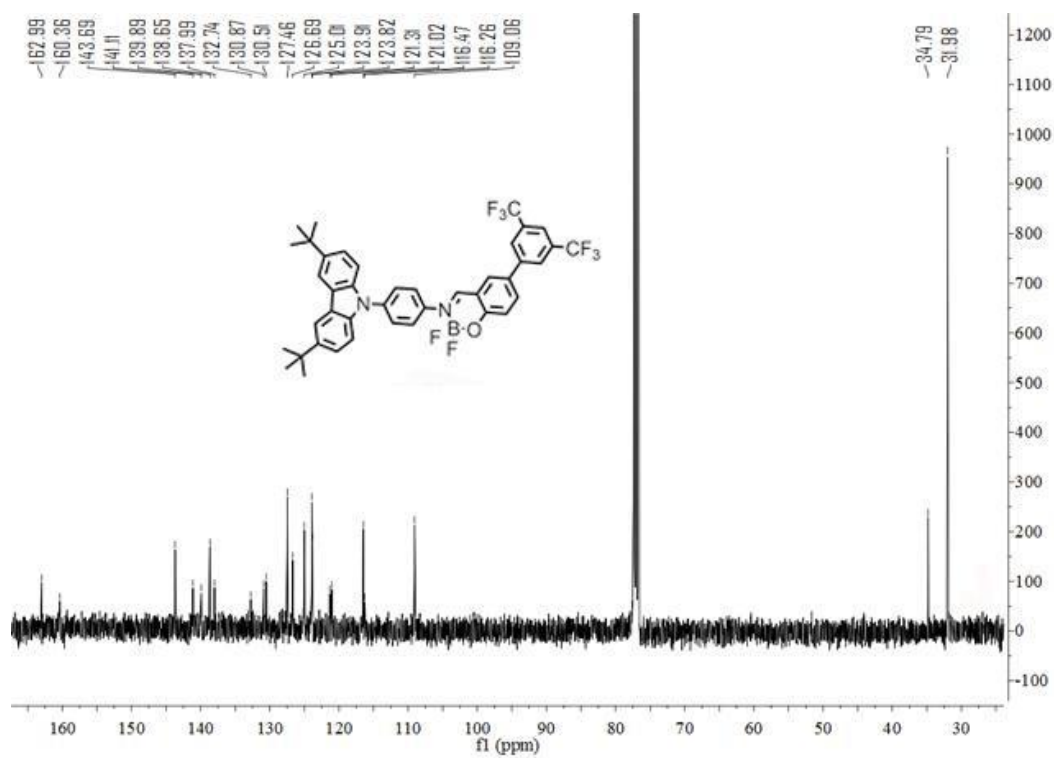

**Fig. S29** <sup>13</sup>C NMR (100 MHz, CDCl<sub>3</sub>) spectrum of **3b**.

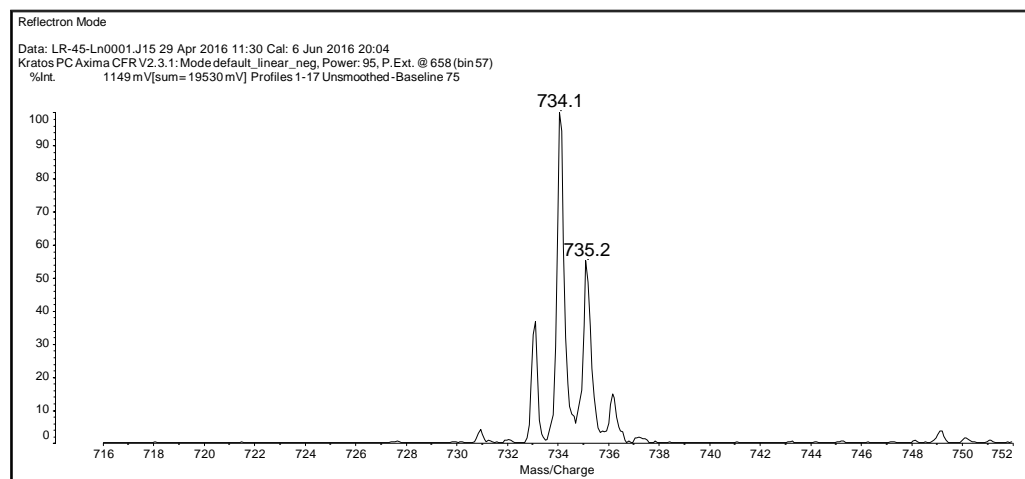

**Fig. S30** MALDI/TOF MS spectrum of **3b**.
